# Supplementary material
Source: Elsevier journal article supplement (https://www.sciencedirect.com/science/article/pii/S0021755721001364)
Supplement: mmc1 [file S0021755721001364:mmc1.docx]

JPED-D-21-00159 – Supplementary Material

**Figure 1 - Flowchart of the research methodology.**

**Exclusions (n = 38):**

**Incomplete survey data (n = 15)**

**Not accept to participate (n = 23)**

**Adolescents with chronic immunosuppressed conditions (n = 555)**

**Exclusions (n = 200):**

**Incomplete survey data (n = 48)**

**Not accept to participate (n = 152)**

**Control group:**

**Healthy adolescents (n = 111)**

**Study Group:**

**Adolescents with chronic immunosuppressed conditions (n = 355)**

**Healthy adolescents (n = 149)**
